# Supplementary material for: Resolving drug selection and migration in an inbred South American Plasmodium falciparum population with identity-by-descent analysis
Source: PubMed Central journal article supplement (PMC9815574; doi:10.1371/journal.ppat.1010993), 2022-12-21

**A**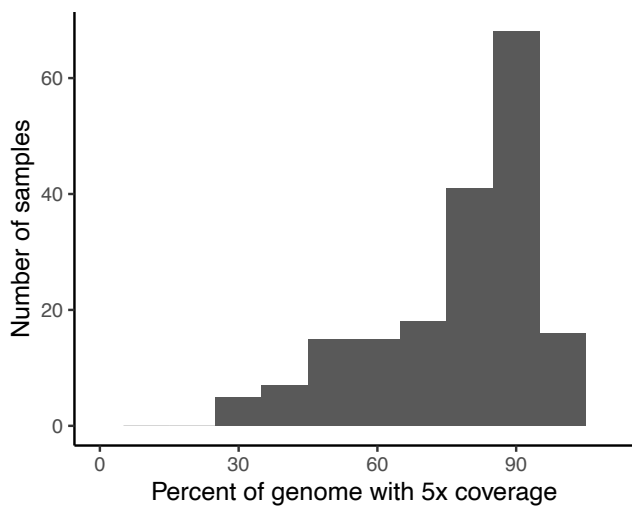**B**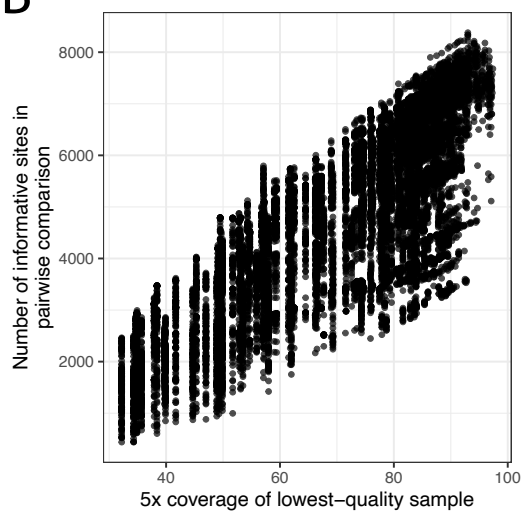**C**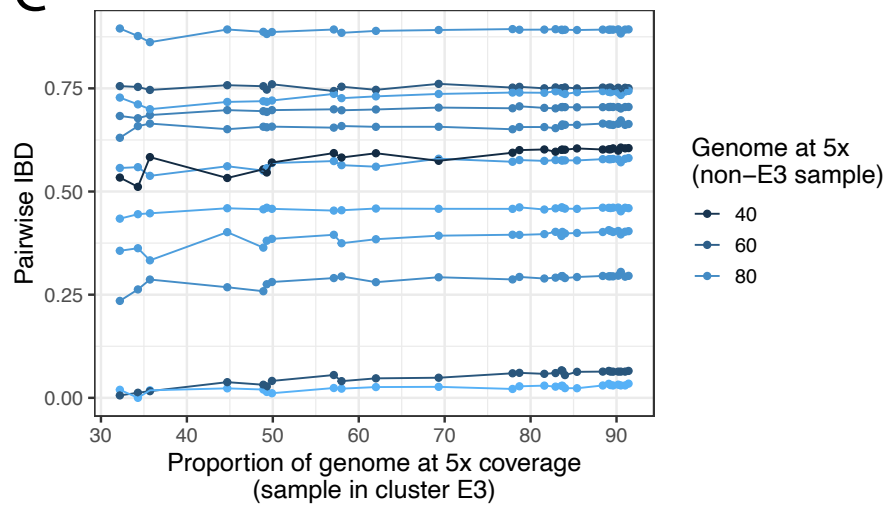**D**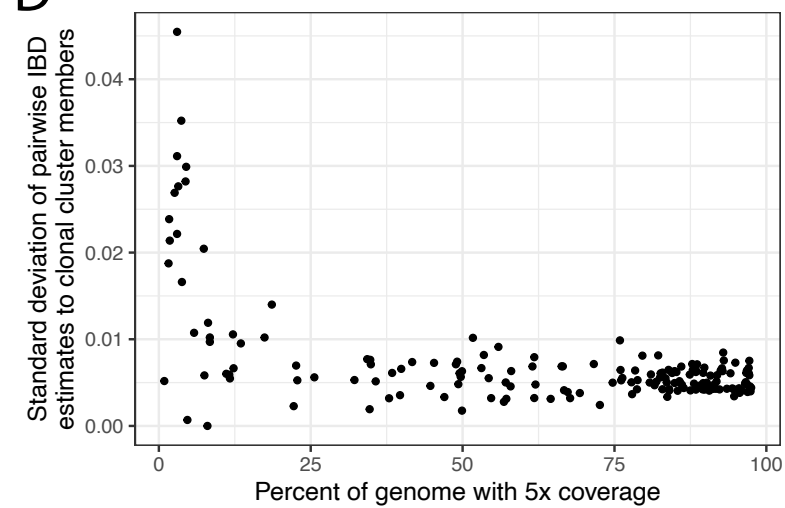

Supplement: ppat.1010993.s010.pdf [file ppat.1010993.s010.pdf]
